# Supplementary material
Source: PubMed Central journal article supplement (PMC4775121)
Supplement: supp_pp.15.01501_01501suppdata.pdf [file supp_pp.15.01501_01501suppdata.pdf]

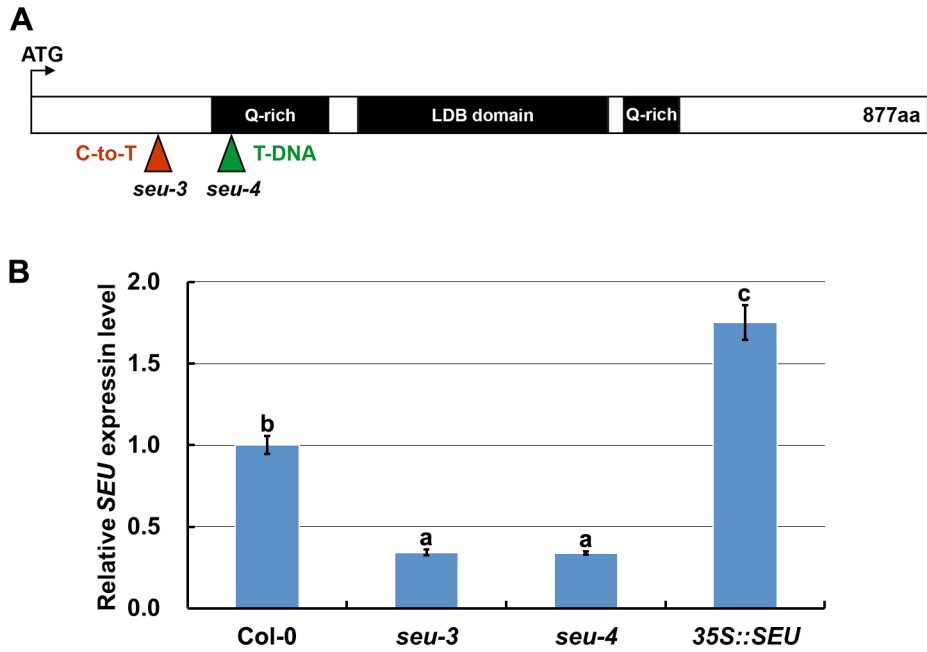

**Supplemental Figure S1.** Expression of *SEU* in different genetic backgrounds as indicated. (A) Schematic diagram of *SEU* protein (877 aa), which contains a LIM-domain-binding (LDB) motif and 2 Q-rich domains. Arrowheads point to the mutation sites in *seu-3* and *seu-4*. (B) qRT-PCR analysis of *SEU* transcript levels in roots of Col-0, *seu-3*, *seu-4* and 35S::*SEU* seedlings 7d after sowing. *GAPC* (AT3G04120) was chosen as the reference gene. The *SEU* mRNA level in Col-0 was arbitrarily set to 1. Error bars represent standard deviation (SD) of three independent experiments. Bars with different letters are significantly different at  $P < 0.05$ , ANOVA.

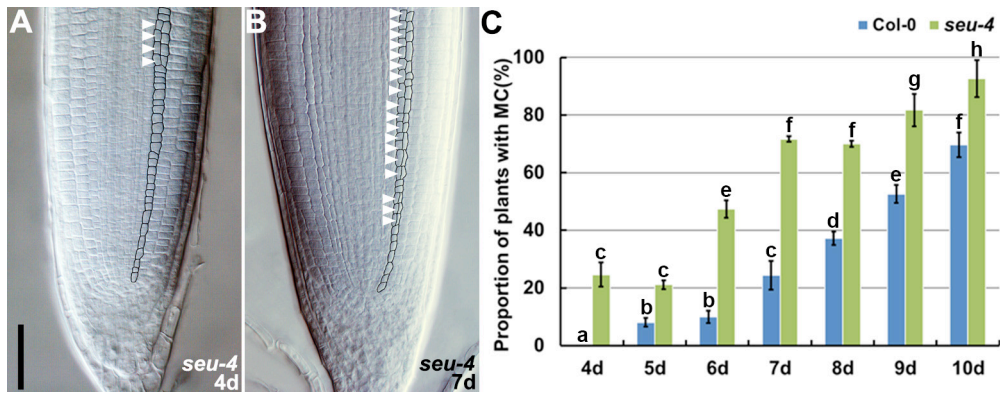

**Supplemental Figure S2. MC formation in *seu-4*.**

(A and B) Occurrence of MC formation in roots of *seu-4* at 4d (A) and 7d (B) after sowing. The black outlines and white arrowheads highlight the occurrence of MC formation in the root endodermis. Scale bar, 50  $\mu$ m.

(C) Time-course analysis of proportion of plants with MC formation in roots of Col-0 and *seu-4* seedlings. Error bars represent SD of three independent experiments ( $n \geq 25$ ). Bars with different letters are significantly different at  $P < 0.05$ , ANOVA.

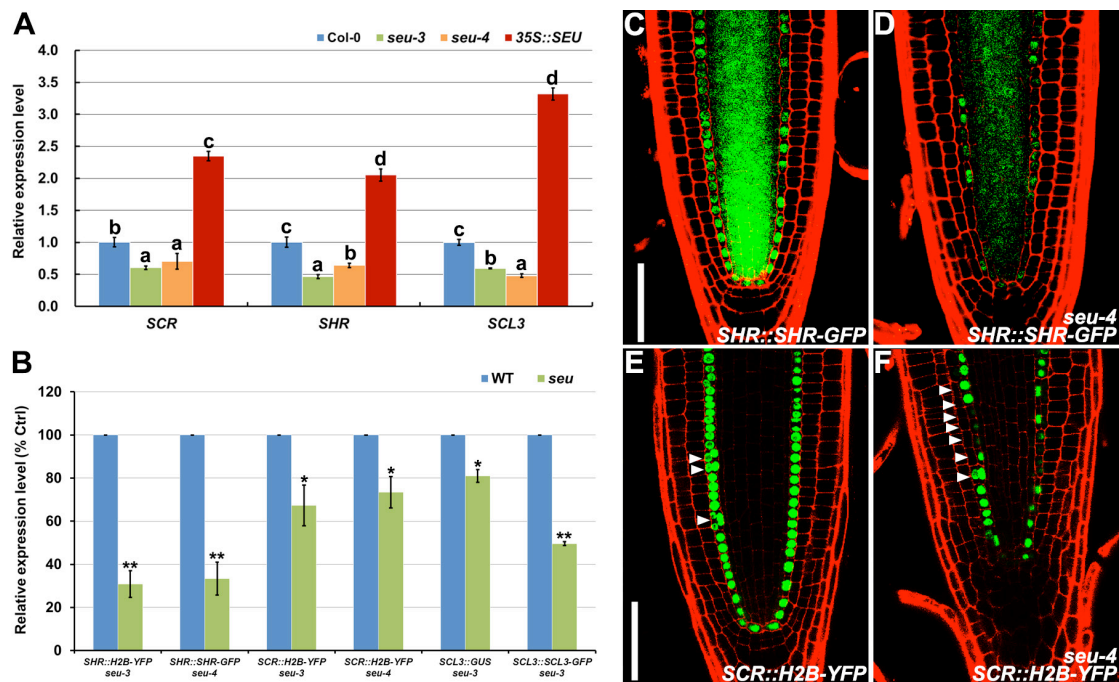

**Supplemental Figure S3.** Expression of *SCR*, *SHR* and *SCL3* in different genetic backgrounds as indicated.

(A) qRT-PCR analysis of *SCR*, *SHR* and *SCL3* transcript levels in roots of Col-0, *seu-3*, *seu-4* and *35S::SEU* seedlings 7d after sowing. *GAPC* (AT3G04120) was chosen as the reference gene. The mRNA level of each gene in Col-0 was arbitrarily set to 1. Error bars indicate SD of three independent experiments. Bars with different letters are significantly different at  $P < 0.05$ , ANOVA.

(B) The expression level of H2B-YFP, GFP or GUS in *seu* mutants relative to that of corresponding control transgene in Col-0, which was arbitrarily set to 100. Error bars indicate SD of three independent experiments. \*,  $P < 0.05$ ; \*\*,  $P < 0.01$ , t-test.

(C to F) Expression of *SHR::SHR-GFP* (C and D), *SCR::H2B-YFP* (E and F) in root tips of Col-0 (C and E), *seu-4* (D and F) seedlings. The white arrowheads indicate the occurrence of MC formation in the root endodermis. Scale bar, 50  $\mu\text{m}$ .

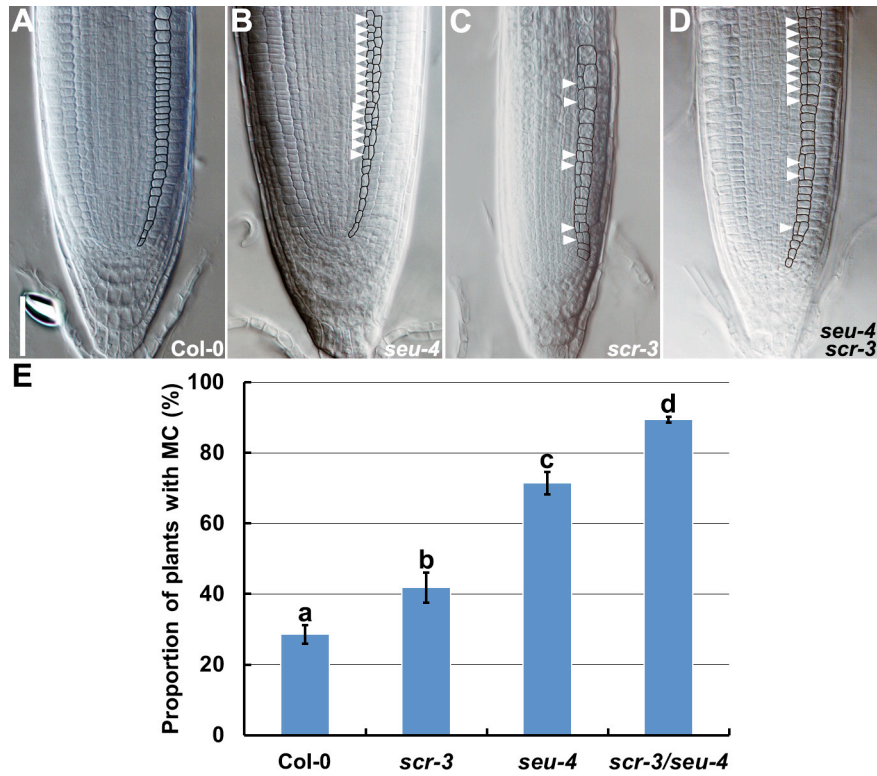

**Supplemental Figure S4.** MC formation in different genetic backgrounds as indicated.

(A to D) Occurrence of MC formation in roots of Col-0 (A), *seu-4* (B), *scr-3* (C) and *seu-4 scr-3* (D) 7d after sowing. The black outlines and white arrowheads highlight the occurrence of MC formation in the root endodermis. Scale bar, 50  $\mu$ m.

(E) Time-course analysis of proportion of plants with MC formation in roots of Col-0 and *seu-4* seedlings. Error bars represent SD of three independent experiments ( $n \geq 15$ ). Bars with different letters are significantly different at  $P < 0.05$ , ANOVA.

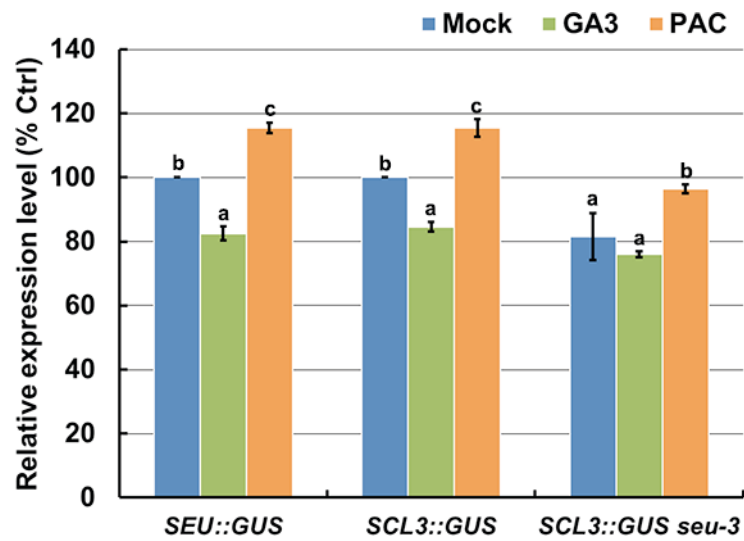

**Supplemental Figure S5.** SEU mediates the regulation of *SCL3* by GA signaling.

The relative expression level of *SEU::GUS* or *SCL3::GUS* in Col-0 or *seu-3* treated with mock, 10  $\mu$ M GA<sub>3</sub> or 10  $\mu$ M PAC. The expression level of *SEU::GUS* or *SCL3::GUS* in mock-treated Col-0 was arbitrarily to 100. Error bars indicate SD of three independent experiments. Bars with different letters are significantly different at  $P < 0.05$ , ANOVA.

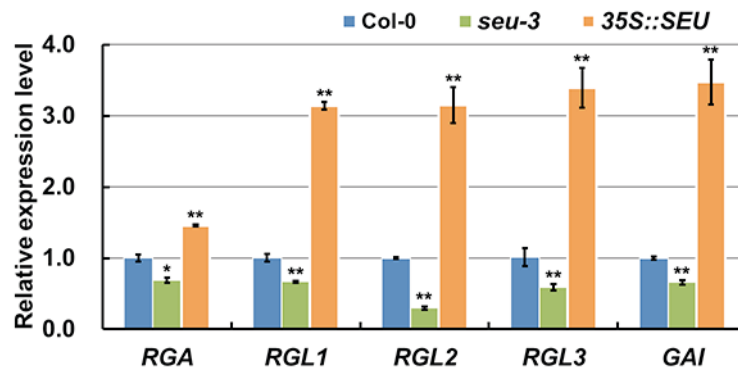

**Supplemental Figure S6.** Expression of DELLA protein-encoding genes in different genetic backgrounds as indicated.

qRT-PCR analysis of *REPRESSOR OF GAI-3 (RGA)*, *RGA-LIKE1 (RGL1)*, *RGL2*, *RGL3* and *GIBBERELLIC ACID INSENSITIVE (GAI)* transcript levels in roots of Col-0, *seu-3* and *35S::SEU* seedlings 7d after sowing. *GAPC* (AT3G04120) was chosen as the reference gene. The mRNA level of each gene in Col-0 was arbitrarily set to 1. Error bars represent SD of three independent experiments. \*,  $P < 0.05$ ; \*\*,  $P < 0.01$ , t-test.

| Experiments / Primer names | Sequences (5' to 3')                                                                                     | Experiments / Primer names | Sequences (5' to 3')    |
|----------------------------|----------------------------------------------------------------------------------------------------------|----------------------------|-------------------------|
| <b>Genotyping</b>          |                                                                                                          | <b>CHIP-qPCR</b>           |                         |
| <i>seu-3</i>               | L.P: GAAAATGTTCCGCCTTCGAT<br>R.P: GAATTGCTGCGGTTCCAAC<br>Digestion with <i>Bsl</i> I                     | SCR-CHIP-292-472-PF        | CCGATCACCCACCTAATCTC    |
| <i>scr-3</i>               | L.P: ACTCAACTCGTGTCTCGGAAT<br>R.P: TCTTCACTCTCTCGCCGTA<br>Digestion with <i>Bsr</i> I                    | SCR-CHIP-292-472-PR        | TGGCCGTATCTAAGTCGTC     |
| <i>shr-2</i>               | L.P: GCCACATCATCAACCCCTTCT<br>R.P: GCCTAGCGAATTTCTCCATTC<br>Wild type band: 679 bp; mutant band: 1100 bp | SCR-CHIP-798-856-PF        | TGCTGACTCCATATGACCAT    |
| <i>seu-4-LP</i>            | TTCCGTGGTGTTCAGACTC                                                                                      | SCR-CHIP-798-856-PR        | GAGCTACATGAGTTGGATT     |
| <i>seu-4-RP</i>            | TTTTGGCATTAGGAGCAAAG                                                                                     | SCR-CHIP-898-955-PF        | CATCTTAGTAAGCACATCG     |
| <i>gal-1-LP</i>            | CAGACCCGAGACAGTAACCTGC                                                                                   | SCR-CHIP-898-955-PR        | ATGGGATGAAGAAGTCTCTC    |
| <i>gal-1-RP</i>            | TCTACTCGAGGCAAGCTTG                                                                                      | SCR-CHIP-1208-1264-PF      | TCAGATTTTATCGGGAAC      |
| <i>scr3-LP</i>             | TTCCTGTCTTTAACCCTC                                                                                       | SCR-CHIP-1208-1264-PR      | GAGAGGCCATTACATACATAC   |
| <i>scr3-RP</i>             | AGCCGAGTCTTCTCATGAG                                                                                      | SCR-CHIP-1557-1614-PF      | GACTTGGAGAAAGACATTCAG   |
| lBb1.3                     | ATTTGGCCGATTCGGAAC                                                                                       | SCR-CHIP-1557-1614-PR      | CACACGGCTCAATATGAAAG    |
|                            |                                                                                                          | SCR-CHIP-2053-2131-PF      | GCTGGTGTGAATGGATAAG     |
|                            |                                                                                                          | SCR-CHIP-2053-2131-PR      | ATAGGCCATTAAGGCCCA      |
| <b>Cloning</b>             |                                                                                                          |                            |                         |
| promoter-SEU-PF-KpnI       | TCCGGTACCACCATTAACCATTACAACCAACTC                                                                        | SCL3-CHIP-88-191-PF        | CTCTGAAAACCTAGTTCCTC    |
| promoter-SEU-PR-BamHI      | CGCGGATCCACTTTACTAATTCACAACCTCCAC                                                                        | SCL3-CHIP-88-191-PR        | CGAAGAACAACCAACCCAGAT   |
| SEU-cds-PF-XhoI            | TATCTCGAGATGGTACCATCAGAGCCGCC                                                                            | SCL3-CHIP-169-278-PF       | TAATTCAGCTCTCTGTTTGTG   |
| SEU-cds-PR-SmaI            | GTACCCGGG AGCGCGTTCCAATCAAAATTG                                                                          | SCL3-CHIP-169-278-PR       | CAGAGGAAGTGGGTTTGG      |
|                            |                                                                                                          | SCL3-CHIP-418-498-PF       | CATTTACACACACGCTATTAC   |
|                            |                                                                                                          | SCL3-CHIP-418-498-PR       | GTGAGAGGGTCTCTCAATCT    |
| <b>qRT-PCR</b>             |                                                                                                          |                            |                         |
| GAPC-PF                    | GGAGCTGACTACGTTGTGAG                                                                                     | SCL3-CHIP-730-570-PF       | GTAGTACTAGTACAATAATAG   |
| GAPC-PR                    | TATTCGTGCTCGTTGACACC                                                                                     | SCL3-CHIP-730-570-PR       | CGTACCAGACAATGCGTGATAG  |
| SEU-PF                     | GCCACCTCTGAAACCAAGTGTATG                                                                                 | SCL3-CHIP-716-787-PF       | CACCACCTTAAGGAGCCTC     |
| SEU-PR                     | ACGCACCATCTCTTTTGG                                                                                       | SCL3-CHIP-716-787-PR       | GTGTACTAGTACTACATGAATG  |
| SCR-PF                     | TAGCGGTTGGAGACCATCG                                                                                      | SCL3-CHIP-1045-1141-PF     | GTTGTATTCTGTATGTATCTA   |
| SCR-PR                     | CGCTGTGTAGTGCATTTCC                                                                                      | SCL3-CHIP-1045-1141-PR     | GCAACACTTAATTGAAGGAAG   |
| SHR-PF                     | TGGTCGAGGAGGATGAGGAATAG                                                                                  | SCL3-CHIP-1191-1315-PF     | CGTGTGGACGTTCTCTTCTC    |
| SHR-PR                     | ACACTGTACCATCGACCAACACC                                                                                  | SCL3-CHIP-1191-1315-PR     | CATGGCATGAGGTGGATTGG    |
| SCL3-PF                    | TGGCTGTGTTGGGAATGTCC                                                                                     | SCL3-CHIP-1396-1410-PF     | GTGAGCATTAAAGAAGAAAAGAC |
| SCL3-PR                    | ATTACTGCGCACCCGCTCTC                                                                                     | SCL3-CHIP-1396-1410-PR     | GAGATGAGGCTGAGGCTGGGGT  |
| RGA-PF                     | AGTTCGAATAGTCAAGAC                                                                                       | SCL3-CHIP-1543-1608-PF     | CTGTAGAATCTCTGGTCAAT    |
| RGA-PR                     | CATCCATTACTCTCCACAC                                                                                      | SCL3-CHIP-1543-1608-PR     | CTGTGTGAGAGAGAACATTA    |
| GAI-PF                     | CGTTGAGTCAGTGGAGGAA                                                                                      | SCL3-CHIP-1855-1915-PF     | CGAGTAGCAGATCCAAAGTTG   |
| GAI-PR                     | TGGCTATGAGCGGTCTGTGT                                                                                     | SCL3-CHIP-1855-1915-PR     | CGAAGACCCTCAGAGAATA     |
| RGL1-PF                    | ACCGGGTAGAGGCGATGAGACT                                                                                   | SHR-CHIP-133-208-PF        | CTCACAATCCACCAAAACCA    |
| RGL1-PR                    | CGATTGATCGCCACGCAGA                                                                                      | SHR-CHIP-133-208-PR        | TCTTGTGTTCTCGGTGGGA     |
| RGL2-PF                    | CGCTTACGCTACCCGAGATG                                                                                     | SHR-CHIP-690-761-PF        | ACTTGGGTGGATCGATGTA     |
| RGL2-PR                    | GAGTTCCACGCCGAGGTTG                                                                                      | SHR-CHIP-690-761-PR        | AGGTCGATATCATGTAATGGCTT |
| RGL3-PF                    | GAAGCGCTTCACTATTACTCG                                                                                    | SHR-CHIP-956-1062-PF       | GTCTGTTGATTAGGATGCGT    |
| RGL3-PR                    | ACTGAGCCAGCTCTCGTGC                                                                                      | SHR-CHIP-956-1062-PR       | ATATAGGCCAAATACATG      |
|                            |                                                                                                          | SHR-CHIP-1337-1445-PF      | TGGTGACCCTTAAGTATTTAT   |
|                            |                                                                                                          | SHR-CHIP-1337-1445-PR      | GCTAGCATCTACAATGAACAAG  |
| <b>YIH</b>                 |                                                                                                          |                            |                         |
| SCR-1-377-PF-EcoRI         | GCGGAATTCGATGAATAGAGATAGAAAAGAGT                                                                         | SHR-CHIP-1524-1602-PF      | TGGAGAGAGGTTAGGAGGCA    |
| SCR-1-377-PR-XhoI          | TFACTCGAGGGAGATTGAAGGTTGTTGGT                                                                            | SHR-CHIP-1524-1602-PR      | CAGGCGTGAAGAAAAGCTGA    |
| SCR-297-826-PF-EcoRI       | GCGGAATTCGCGTTTATGAATCCAACCTCA                                                                           | SHR-CHIP-1723-1859-PF      | ATGGCATGACTTAGTGGAGAG   |
| SCR-297-826-PR-XhoI        | GCTCTCGAGTATCTAAGTCGTCTTCCACCT                                                                           | SHR-CHIP-1723-1859-PR      | ATGTGCATATTCTTACCT      |
| SCR-836-2164-PF-EcoRI      | GCGGAATTCAGATGTGATCCTCTGCAACA                                                                            | SHR-CHIP-1978-2091-PF      | AGACAAGATTAACTGTTGATCG  |
| SCR-836-2164-PR-XhoI       | TFACTCGAGATGGTATATGGAGTCAGCA                                                                             | SHR-CHIP-1978-2091-PR      | TCCATATGCTACTGTTTATGT   |
| SCL3-1-715-PF-EcoRI        | CAGGAATTCATAATAGTATAAGATAGAT                                                                             | SHR-CHIP-2242-2383-PF      | AGCCTAGGCTATAATGTAGAT   |
| SCL3-1-715-PR-XhoI         | CTGCTCGAGTGAAAGGCCAAAAGCTTGAT                                                                            | SHR-CHIP-2242-2383-PR      | CAAGCAAACCTACATTACATA   |
| SCL3-651-1292-PF-EcoRI     | CAGGAATTCAGAAATCAATATTTACCA                                                                              | SHR-CHIP-3030-3191-PF      | GGTGTCACTTATATGTAGT     |
| SCL3-651-1292-PR-XhoI      | CTGCTCGAGAAGAAATTTAAACAAAAGGTT                                                                           | SHR-CHIP-3030-3191-PR      | AGGTGACCAATTCGTACCAT    |
| SHR-1-462-PF-EcoRI         | GCGGAATTCGTCAAAATCTCAGTTAG                                                                               |                            |                         |
| SHR-1-462-PR-XhoI          | GGCCTCGAGTTTTTTTTTAAATGAATAAGA                                                                           |                            |                         |
| SHR-444-1109-PF-EcoRI      | GCGGAATTCGATTGGTTAGAAATGGTATTA                                                                           |                            |                         |
| SHR-444-1109-PR-XhoI       | GGCCTCGAGTAACTGAGATTTTGGAC                                                                               |                            |                         |
| SEU-TRANS-PF-MfeI          | ACTCAATTGATGGTACCATCAGAGCCGCT                                                                            |                            |                         |
| SEU-TRANS-PR-XhoI          | TACCTCGAGTCACGCTTCCAATCAAAAAT                                                                            |                            |                         |

**Supplemental Table S1. Primers used in this study.**
